# Supplementary material
Source: publisher site journal article supplement (https://www.dovepress.com/article/343205)
Supplement: Supplementary file 1 [file get_supplementary_file.php]

**Supplementary Figure 1** Study flow chart


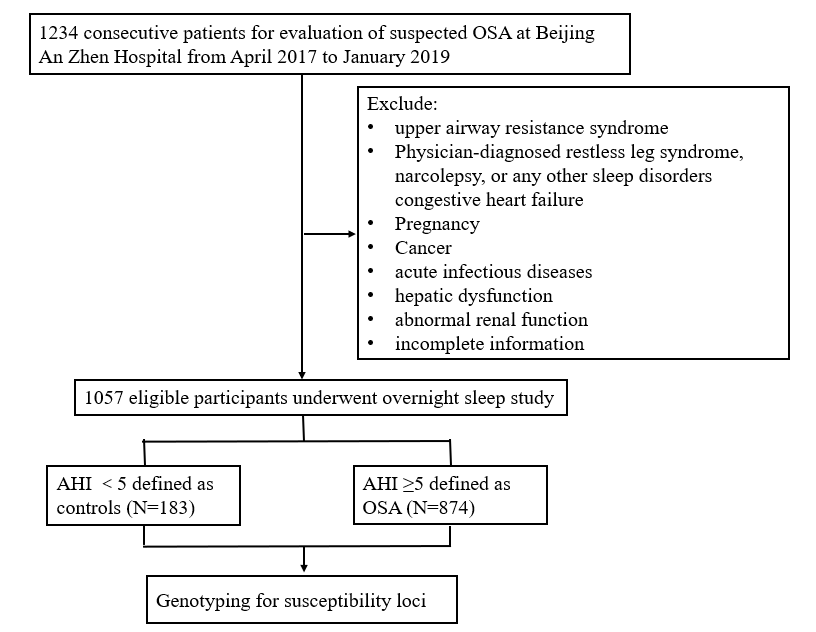


**Supplemental table 1** Multivariable logistic regression analysis of SNPs in *TNF* gene with the risk of OSA

| SNP | Genotypes | unadjusted | | Model 1 | | | Model 2 | |
| --- | --- | --- | --- | --- | --- | --- | --- | --- |
| OR (95%CI) | p-value | OR (95CI) | p-value | OR (95CI) | | p-value |
| rs3093661 | GG(n=310) | 1 |  | 1 |  | 1 | |  |
|  | GA (n=30) | 3.682(1.089-12.44) | 0.036* | 4.090(1.089-15.361) | 0.037* | 3.938(1.026-15.109) | | 0.046* |
| rs3093662 | AA(n=309) | 1 |  | 1 |  | 1 | |  |
|  | AG(n=31) | 3.836(1.137-12.94) | 0.030* | 4.449 (1.196-16.546) | 0.026* | 4.340 (1.1.43-16.480) | | 0.031* |
| rs3093664 | AA(n=309) | 1 |  | 1 |  | 1 | |  |
|  | AG(n=31) | 3.836(1.137-12.94) | 0.030* | 4.449 (1.196-16.546) | 0.026* | 4.340 (1.1.43-16.480) | | 0.031* |

Model 1: adjusted for age, sex, BMI, Smoker and Drinker

Model 2: adjusted for Model 1 + TG, TC, LDL-C, HDL-C and FBG.

*P<0.05.

**Supplemental table 2** PCR primer of 9 SNPs

| SNP_ID | 2nd-PCRP | 1st-PCRP | UEP_SEQ |
| --- | --- | --- | --- |
| rs3093661 | ACGTTGGATGATCAGCG  CACATCTTTCACC | ACGTTGGATGCCAGCC  TTCATCCACTCTC | TCTCTCTCCCTCTCTTG |
| rs3093664 | ACGTTGGATGCGAGTCC  TTCTCACATTGTC | ACGTTGGATGAGCTCT  GAGGATGTGTCTTG | CATCAGCCGGGCTTCAA |
| rs1801282 | ACGTTGGATGTGTATCAG  TGAAGGAATCGC | ACGTTGGATGCAAACC  CCTATTCCATGCTG | TGAAGGAATCGCTTTCTG |
| rs4686803 | ACGTTGGATGTCGGCTTA  CTGCAACCTTTG | ACGTTGGATGATGGTG  GTAGGCACCTGTGG | AACCTTTGCCTCCCAGGTT |
| rs1063537 | ACGTTGGATGGGTTGAGG  TAGTTGATGGTG | ACGTTGGATGGAGAAT  GCTATTTACTCTG | ACAATAACTCCAGTGATGTT |
| rs3093662 | ACGTTGGATGTCTTAGCCC  TGAGGTGTCTG | ACGTTGGATGGGAAAGA  GCTGTTGAATGCC | GGTTTTCTCTCTCCATTCATC |
| rs2241766 | ACGTTGGATGCCTTGAGTC  GTGGTTTCCTG | ACGTTGGATGTGCTGGG  AGCTGTTCTACTG | AGTCGTGGTTTCCTGGTCATG |
| rs3774262 | ACGTTGGATGATTATGGGA  GCCTCCATGTC | ACGTTGGATGAGAAACC  AATAAGAGCTCCC | TCTGTGGGAGATATAGAAGGA |
| rs2082940 | ACGTTGGATGACTATCTTTT  TGCTTACAG | ACGTTGGATGGACAAAG  CTTTATATGTGG | TCTTTTTGCTTACAGTTTTAAAT |

**Supplemental table 3** Hardy-Weinberg equilibrium

| SNP | Genotype | | | Controls | | | | | | Cases | | | | | |
| --- | --- | --- | --- | --- | --- | --- | --- | --- | --- | --- | --- | --- | --- | --- | --- |
|  | Actual | | | Expected | | χ2 | P | Actual | | Expected | | | χ2 | P |
| rs1063537 | CC | 109 | | | | 110.96 | 0.71 | 0.70 | | 465 | | 469.38 | 0.57 | | 0.75 |
|  | CT | | 67 | | | 63.07 |  |  | | 351 | | 342.24 | |  |  |
|  | TT | | 7 | | | 8.96 |  |  | | 58 | | 62.38 | |  |  |
| rs2082940 | CC | 108 | | | | 109.41 | 0.35 | 0.84 | | 461 | | 465 | 0.47 | | 0.79 |
|  | CT | | 67 | | | 64.18 |  |  | | 353 | | 345.01 | |  |  |
|  | TT | | 8 | | | 9.41 |  |  | | 60 | | 64 | |  |  |
| rs4686803 | CC | 109 | | | | 110.96 | 0.71 | 0.70 | | 462 | | 466.46 | 0.59 | | 0.75 |
|  | CT | | 67 | | | 63.07 |  |  | | 353 | | 3444.09 | |  |  |
|  | TT | | 7 | | | 8.96 |  |  | | 59 | | 63.46 | |  |  |
| rs2241766 | TT | 109 | | | | 110.96 | 0.71 | 0.70 | | 458 | | 462.81 | 0.67 | | 0.71 |
|  | TG | | 67 | | | 63.07 |  |  | | 356 | | 346.38 | |  |  |
|  | GG | | 7 | | | 8.96 |  |  | | 60 | | 64.81 | |  |  |
| rs3774262 | GG | | 109 | | | 110.96 | 0.71 | 0.70 | | 462 | | 467.19 | 0.80 | | 0.67 |
|  | GA | | 67 | | | 63.07 |  |  | | 354 | | 343.63 | |  |  |
|  | AA | | 7 | | | 8.96 |  |  | | 58 | | 63.19 | |  |  |
| rs3093661 | GG | | 172 | | | 172.17 | 0.18 | 0.92 | | 798 | | 798.70 | 0.31 | | 0.86 |
|  | GA | | 11 | | | 10.67 |  |  | | 75 | | 73.61 | |  |  |
|  | AA | | 0 | | | 0.17 |  |  | | 1 | | 1.70 | |  |  |
| rs3093662 | AA | | 172 | | | 172.17 | 0.18 | 0.92 | | 795 | | 795.83 | 0.41 | | 0.81 |
|  | AG | | 11 | | | 10.67 |  |  | | 78 | | 76.34 | |  |  |
|  | GG | | 0 | | | 0.17 |  |  | | 1 | | 1.83 | |  |  |
| rs3093664 | AA | 172 | | | | 172.17 | 0.18 | 0.92 | | 796 | | 796.79 | 0.38 | | 0.83 |
|  | AG | 11 | | | | 10.67 |  |  | | 77 | | 75.43 | |  |  |
|  | GG | 0 | | | | 0.17 |  |  | | 1 | | 1.79 | |  |  |
| rs1801282 | GG | 153 | | | | 154.23 | 1.46 | 0.48 | | 776 | | 774.98 | 0.40 | | 0.82 |
|  | GC | 30 | | | | 27.54 |  |  | | 94 | | 96.05 | |  |  |
|  | CC | 0 | | | | 1.23 |  |  | | 4 | | 2.98 | |  |  |

**Supplemental table 4** Characteristics of participants

|  | Control | Mild OSA | Moderate OSA | Severe OSA | P-value |
| --- | --- | --- | --- | --- | --- |
| N | 183 | 272 | 266 | 336 |  |
| Male (n, %) | 122 (67.03%) | 214 (78.39%) | 231 (86.84%) | 294 (87.50%) | <0.001** |
| Age (years) | 50.54 ± 14.25 | 54.86 ± 12.16 | 54.08 ± 11.49 | 49.75 ± 12.36 | <0.001** |
| BMI (kg/m2) | 24.68 ± 3.83 | 26.35 ± 3.77 | 27.53 ± 3.48 | 29.26 ± 3.91 | <0.001** |
| SBP (mmHg) | 126.95 ± 19.69 | 130.26 ± 18.14 | 131.51 ± 19.65 | 131.79 ± 18.42 | 0.037* |
| DBP (mmHg) | 78.09 ± 14.37 | 79.36 ± 13.02 | 80.96 ± 14.31 | 83.57 ± 14.39 | <0.001** |
| HDL-C#(mmol/L) | 1.15 (0.99-1.36) | 1.10 (0.92-1.30) | 1.04 (0.89-1.24) | 1.06 (0.91-1.24) | <0.001** |
| LDL-C(mmol/L) | 2.71 ± 0.82 | 2.65 ± 0.94 | 2.55 ± 0.97 | 2.88 ± 0.93 | <0.001** |
| TC (mmol/L) | 4.49 ± 1.13 | 4.48 ± 1.19 | 4.47 ± 1.19 | 4.79 ± 1.17 | 0.001* |
| TG# (mmol/L) | 1.29 (0.95-1.72) | 1.54 (1.09-2.23) | 1.50 (1.12-2.18) | 1.78 (1.21-2.48) | <0.001** |
| FPG (mmol/L) | 5.37 ± 1.73 | 8.46 ± 36.19 | 5.77 ± 2.73 | 5.82 ± 2.23 | 0.219 |
| AHI (times/h) | 2.31 ± 1.33 | 9.60 ± 2.72 | 21.72 ± 4.15 | 50.74 ± 16.92 | <0.001** |
| Drinker (n, %) | 70 (38.46%) | 100 (36.76%) | 106 (39.85%) | 167 (49.70%) | 0.005* |
| Smoker (n, %) | 69 (37.91%) | 129 (47.25%) | 116 (44.11%) | 153 (45.81%) | 0.233 |
| ESS score# | 6 (3-10) | 6 (3-10) | 7 (4-11) | 9 (5-14) | <0.001** |
| Berlin Questionnaire  high risk (n, %) | 35 (27.78%) | 103 (38.29%) | 127 (54.04%) | 228 (74.75%) | <0.001** |

Values were expressed as mean ± standard deviation, median ± interquartile range or n (%).

#Data were asymmetrically distributed and expressed as median ± interquartile

Differences between groups were analyzed by independent Student t-test, Fisher’s exact test, χ2 test, or Wilcoxon test.

Abbreviations: OSA, Obstructive sleep apnea; BMI, body mass index; SBP, systolic blood pressure; DBP, diastolic blood pressure; FPG, fasting plasma glucose; TG, triglycerides; TC, total cholesterol; LDL-C, low-density lipoprotein cholesterol; HDL-C, high-density lipoprotein cholesterol; AHI, apnea-hypopnea index; ESS, Epworth Sleepiness Scale

*P<0.05, **P<0.001
